# Supplementary material
Source: PubMed Central journal article supplement (PMC3755953)
Supplement: NIHMS502302-supplement-ESI.pdf [file NIHMS502302-supplement-ESI.pdf]

## *Supplementary Information*

# **A Microfluidic Approach for Protein Structure Determination at Room Temperature via on-chip Anomalous Diffraction**

**Sarah L. Perry<sup>a‡</sup>, Sudipto Guha<sup>a‡</sup>, Ashtamurthy S. Pawate<sup>a</sup>, Amrit Bhaskarla<sup>b</sup>, Vinayak Agarwal<sup>c</sup>, Satish K. Nair<sup>c</sup> and Paul J.A. Kenis<sup>\*a</sup>**

<sup>a</sup> Department of Chemical & Biomolecular Engineering, University of Illinois at Urbana-Champaign, USA.

<sup>b</sup> School of Molecular & Cellular Biology, University of Illinois at Urbana-Champaign, USA.

<sup>c</sup> Department of Biochemistry, University of Illinois at Urbana-Champaign, USA

<sup>‡</sup> These authors contributed equally to the work

\* Correspondence email: [kenis@illinois.edu](mailto:kenis@illinois.edu)

## **Experimental Procedures**

### **S.1 Protein Sample Preparation and Visualization of Crystallization Experiments**

Selenomethionine labeled PhnA from *Sinorhizobium meliloti* was dissolved in 20 mM HEPES, pH 7.5, at a range of concentrations: 15, 20, 25 and 40 mg/mL. For screening experiments, the 96-condition Hampton Index Screen (Hampton Research) was used and the condition I-80 (0.2M ammonium acetate, 0.1M HEPES pH 7.5 and 25% (w/v) PEG 3350) was identified for further optimization. The crystallization trials were set up with the protein solution at 1:1 v/v ratio and were incubated at 9°C.

Traditional microbatch-under-oil crystallization trials were set up combining 2  $\mu$ L each of protein and precipitant solutions in a Greiner well plate (Hampton Research) at 9°C. These were harvested using Mitegen crystal mounts.

Crystallization experiments were set up and visualized using a stereomicroscope (Leica, MZ12.5) with an attached digital camera (Leica, DFC295) operated using Leica Application Suite software or a computer controlled imaging system comprised of an optical microscope (Leica Z16 APO) equipped with an auto-zoom lens (Leica 10447176), a digital camera (Leica DFC280), and a motorized x-y stage (Semprex KL66) controlled by Image Pro Plus (Media Cybernetics). Images were taken with the help of a cross-polarizer.

### **S.2 Operation of Array Chips**

The array chips are comprised of layers of different polymers. The fluid layer is fabricated out of poly(dimethylsiloxane) (PDMS, General Electric RTV 650) using standard soft lithographic techniques.<sup>1</sup> The control layer is fabricated from cyclic olefin copolymer (COC, TOPAS Advanced Polymers Inc., 4 mil) via hot embossing. Thin sheets of COC (2 mil) or Duralar sheets (Graphix Plastics, 0.5 mil) are used as a flat substrate on which the assembled chip is placed. A more detailed description of the fabrication procedure can be found elsewhere.<sup>2</sup>

The microfluidic array chips consist of separate half-wells for protein and precipitant solutions. The two half-wells are filled independently of each other using dedicated valve lines for each set of half-wells. Actuate-to-open valving and fluid filling was achieved by the application of vacuum from a vacuum pump connected to the device through a plastic gas manifold (Cole-Parmer Instrument Co.) and PTFE tubing coupled with a thin metal tube to a small block of PDMS aligned over the inlets for the various control lines (Figure S1).<sup>3</sup> Vacuum within the chip due to actuation of valves and the air permeability of PDMS then

served to pull the corresponding solutions into the chambers. First 1-2  $\mu\text{L}$  of protein solution is pipetted onto the protein line inlet and vacuum is pulled through the corresponding valve line, which allows dead filling of the protein into the series of half-wells. Once the protein solution has been filled, the protein inlet and valve line are sealed with Crystal Clear tape (Hampton Research). Next, the precipitant solution is loaded onto the chip by pipetting 1  $\mu\text{L}$  droplets of precipitant solution onto each of the six precipitant inlet holes. Vacuum is then applied via the precipitant valve lines and the precipitant solutions fill into the appropriate half-wells. The mixing valves located between the protein and precipitant half-wells are then actuated, allowing the two solutions to mix by diffusion. Because mixing between the two half-wells occurs diffusively, it is necessary to hold these valves open for a period of time. For PhnA, this mixing time was optimized at  $\sim 1$  hour. After allowing time for mixing, the mixing valves are allowed to relax and the remaining inlets are sealed with Crystal Clear tape and the crystallization trials are allowed to incubate. A more detailed description of the device geometry and filling procedure is described elsewhere.<sup>2</sup> Samples were mounted on a modified magnetic goniometer mount (Hampton Research) with an attached metal tube into which a slit was cut and set-screw was used for securing samples.

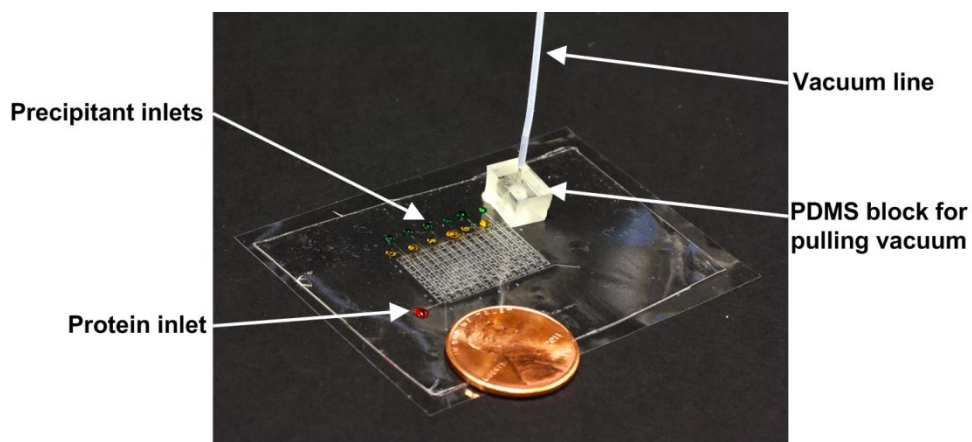

**Figure S1.** Optical micrograph showing the setup of a 96-well microfluidic array chip, including the placement of reagents droplets at inlets, and the way it is connected to a vacuum line to actuate sets of valves.

### S.3 Screening for Protein Crystallization Conditions

The first step in structure determination of a new protein is screening against various potential crystallization reagents. Screening was performed using the 96-condition Index Screen (Hampton Research) on a 96-well chip where the ratio of protein-to-precipitant was varied (4:1 to 1:4). Each 96-well screening chip allows 12 different precipitants to be screened against a single protein solution. A total of eight chips were used for screening the entire Index Screen. Each chip requires just 6  $\mu\text{L}$  of protein and 2  $\mu\text{L}$  of each precipitant solution to screen a total of 96 different conditions. Since the chamber volume ratio is varied along the vertical, we are screening each of these 12 conditions over 8 different protein-to-precipitant ratios, effectively increasing the experimental range of our experiment. This type of screen, varying the protein-to-precipitant ratio, can be set up automatically on our microfluidic chips, while it would be much harder to implement at the traditional well plate scale where each condition would need to be set up independently. Each of our chips takes  $< 5$  minutes to set up, thus enabling a large number of crystallization trials to be set up in a high throughput fashion. The microfluidic chips are extremely simple to set up, requiring only a pipette to meter the protein and precipitant solutions and a vacuum pump with a Teflon-tubing based

connector to fill in the solutions into the chip (Figure S1).<sup>2</sup> Table S1 gives details of the screening of PhnA with the Index Screen and the conditions that gave hits (*i.e.*, crystals). Figure S2 shows a 96-well array chip with close ups of the crystals obtained in the screening phase.

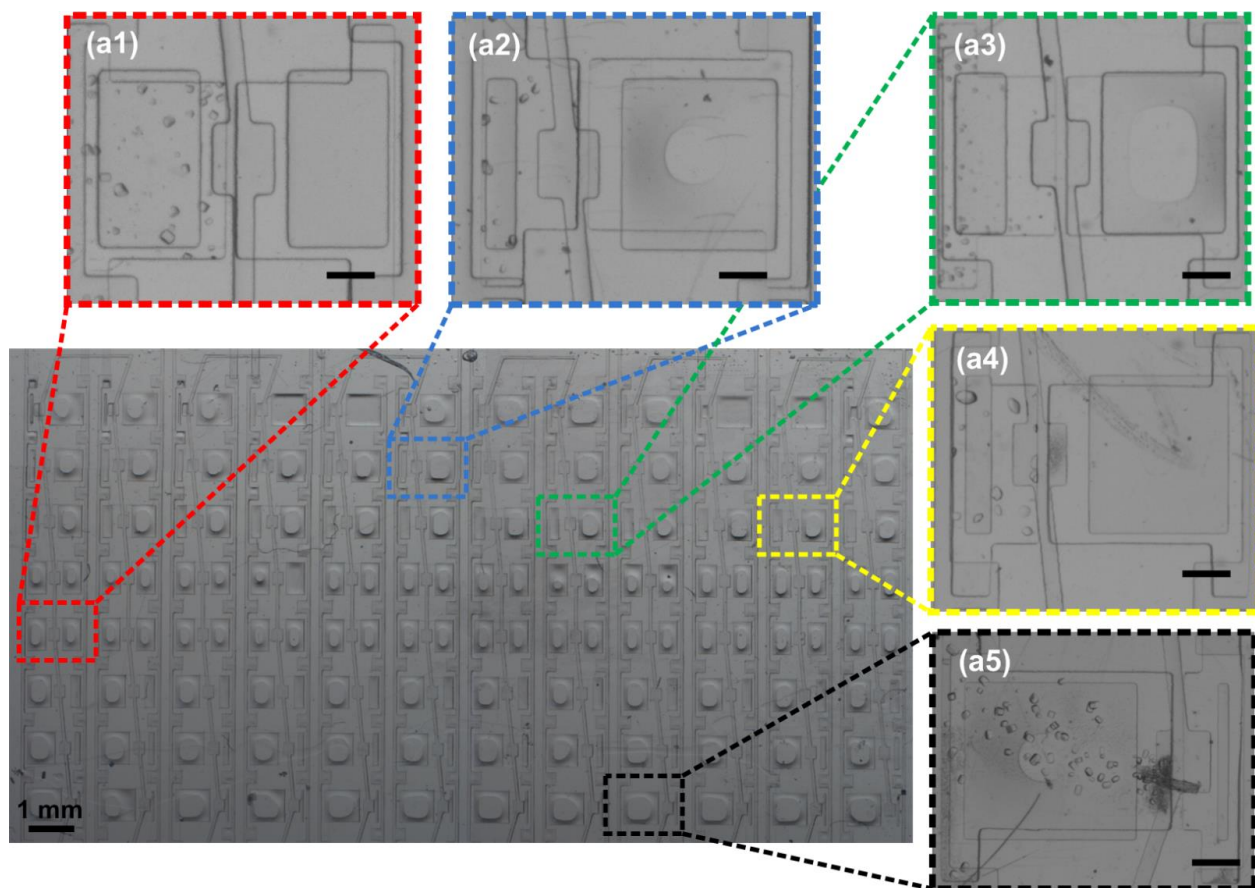

**Figure S2.** Optical micrograph of a 96-well hybrid array based screening chip showing screening of PhnA using the Index Screen. 12 different precipitants are screened in separate columns on a single chip. The enlarged views on top and side show initial crystal hits from condition **(a1)** I-42, **(a2)** I-47, **(a3)** I-54, **(a4)** I-70, and **(a5)** I-71 from the Index Screen. The scale bars in the insets correspond to 200  $\mu\text{m}$ .

**Table S1.** Summary of crystallization results of a microfluidic screen of 25 mg/mL PhnA in 20mM HEPES at pH 7.5 against the 96-condition Hampton Index Screen.

| Condition | 1              | 2 | 3 | 4 | 5 | 6 | 7 | 8 | 9 | 10             | 11 | 12 | 13 | 14 | 15 | 16 |
|-----------|----------------|---|---|---|---|---|---|---|---|----------------|----|----|----|----|----|----|
| 1-16      | - <sup>a</sup> | - | - | - | - | - | - | - | - | -              | -  | -  | -  | -  | -  | -  |
| 17-32     | -              | - | - | - | - | - | - | - | - | -              | -  | -  | -  | -  | -  | -  |
| 33-48     | -              | - | - | - | - | - | - | - | - | + <sup>b</sup> | -  | -  | -  | -  | +  | -  |
| 49-64     | -              | - | - | - | - | + | - | - | - | -              | -  | -  | -  | -  | -  | -  |
| 65-80     | -              | - | - | - | - | + | + | + | + | -              | -  | -  | -  | +  | +  | +  |
| 81-96     | +              | - | - | - | - | + | + | + | + | +              | +  | +  | -  | +  | +  | +  |

<sup>a</sup>- No crystals observed. <sup>b</sup>+ Crystals observed

## S.4 X-ray Diffraction Data Analysis

Analysis of X-ray diffraction data collected at the synchrotron was performed using HKL2000 software for indexing, refinement, integration, and scaling (HKL Research Inc.).<sup>4</sup> Anomalous data was first scaled using SCALEPACK in HKL2000 with the "Scale Anomalous" flag and truncated at  $R_{\text{merge}} \leq 0.25$  (resolution 2.75 Å). Phase information was solved using the Phenix.Autosol wizard in Phenix<sup>5</sup> to locate the selenium atoms of the selenomethionine residues, followed by heavy atom refinement (FOM=0.394). The initial phases were further improved by density modification in the Phenix.Autosol wizard and an initial model was built with the Phenix.Autobuild wizard with 72% completeness. This was used as a starting model in the Phenix.Autobuild wizard for the 2.11Å resolution experimental data where a model that was 79% complete was obtained. The model was further extended to 97% completeness using ARP/wARP<sup>6</sup> and refined using Phenix.Refine wizard to  $R_{\text{work}}$  of 0.176 and  $R_{\text{free}}$  of 0.211. Images were generated using PyMOL<sup>7</sup> and Coot.<sup>8</sup>

This is the first report of PhnA structure determination using a SeMet derivative (Table S2). The data obtained here is in good agreement both with the structure obtained from analysis of a single crystal grown in a traditional well plate as evidenced by a RMSD < 0.4 Å when aligned in PyMOL,<sup>7</sup> and with the structural characterization of other PhnA derivatives published by our collaborators.<sup>9</sup> Figure S3 shows a comparison of the electron density maps of the protein active site from the apo form of the protein reported previously (PDB ID: 3SZY)<sup>9</sup>, a single crystal grown in a traditional well plate and analyzed by standard cryo-crystallographic methods, and the structure we obtained using our microfluidic platform. We have highlighted three key residues (Asp211, His 215, and His 377) associated with one of the bound metal ( $\text{Zn}^{2+}$ ) ions. All three of these residues and their side chains can clearly be seen interacting with the bound metal ion.<sup>9</sup> Differences in the quality of the various maps are attributable to both the resolution of the data and the extent to which structural refinement was performed. The map shown in Figure S3a is the result of careful model building with significant manual refinement. However, the maps shown in Figures S3b,c were obtained using purely automated structure refinement. The lack of manual intervention in our reported structures can explain minor differences in the depictions, including the orientation of the side chain for His377. Such in-depth structure refinement and a detailed analysis of our structure in comparison to previous reports are beyond the scope of this work.

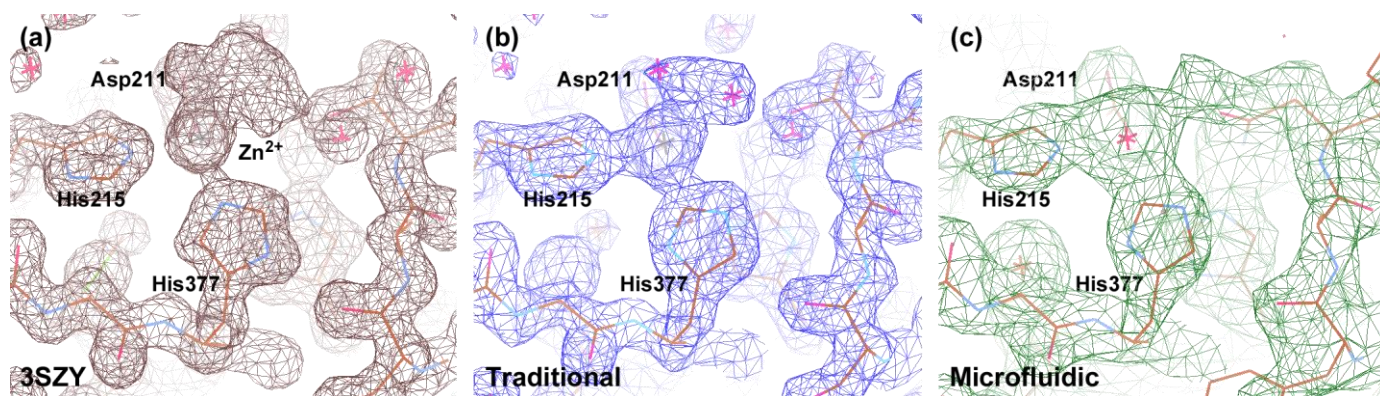

**Figure S3.** Electron density map and theoretical model of a portion of the PhnA active site determined from (a) the apo form of PhnA reported by our collaborators (PDB ID: 3SZY),<sup>9</sup> (b) cryogenic single-crystal data resulting from a crystal grown in a traditional well plate, and (c) merged diffraction data collected on-chip. The structure clearly shows two key histidine residues and a bound Zn ion. The structure in (a) is the result of detailed manual refinement whereas (b) and (c) were generated using purely automated methods. The PhnA carbon atoms are shown in brown in stick representation. Superimposed is a 2Fo-Fc Fourier electron density map (contoured at 1.5 $\sigma$  over background).

As indicated by the statistics in Table S2, the merged dataset was complete, indicative of random orientation of crystals grown on chip. Variations in these statistics were within a range that is typical for good diffraction data.  $R_{\text{sym}}$  provides a measure of the average discrepancy of a particular observation based on an average value of redundant observations. Typical values for  $R_{\text{sym}}$  are .08 – 0.15 for all hkl's and 0.25 – 0.50 for the highest resolution shell. As can be seen from Table S2, the values for  $R_{\text{sym}}$  are within this acceptable range for both crystals.

$I/\sigma$  describes the signal-to-noise ratio for the observed diffraction spots, and can serve as a one of the parameters used to establish the resolution of a structure. Analysis of Table S2 shows that the value of  $I/\sigma$  observed for all hkl's is significantly lower for data obtained on-chip than using traditional cryogenic methods. This lower value is most likely a consequence of (1) the smaller size of the crystals analyzed on-chip and (2) a slight loss of signal and increase in background noise due to the device materials. However, the decrease in signal due to these factors did not significantly impact our ability to collect and analyze our data.

**Table S2.** Comparison of statistics of SeMet PhnA crystals – traditional versus microfluidic crystallization platforms.

| Parameter                               | Traditional Single-crystal (cryogenic) <sup>[a]</sup> | Microfluidic Multiple Crystals (RT) <sup>[b]</sup> |
|-----------------------------------------|-------------------------------------------------------|----------------------------------------------------|
| <b>Data Collection</b>                  |                                                       |                                                    |
| <b>Space Group</b>                      | P4 <sub>3</sub> 2 <sub>1</sub> 2                      | P4 <sub>3</sub> 2 <sub>1</sub> 2                   |
| <b>Unit Cell Dimensions</b>             | a = b = 111.84 Å<br>c = 72.80 Å                       | a = b = 113.19 Å<br>c = 73.87 Å                    |
| <b># of Frames</b>                      | 360                                                   | 188                                                |
| <b>Observations (Unique)</b>            | 1,486,444 (51,052)                                    | 412,491 (28,002)                                   |
| <b>Resolution</b>                       | 50 – 1.70 Å                                           | 50 – 2.11 Å                                        |
| <b><math>R_{\text{sym}}</math></b>      | 0.087 (0.411)                                         | 0.111 (0.508)                                      |
| <b>Completeness</b>                     | 100% (100%)                                           | 99.8% (99.8%)                                      |
| <b>Mosaicity</b>                        | 0.26° – 0.49°                                         | 0.04°                                              |
| <b>Redundancy</b>                       | 28.7 (28.2)                                           | 7.9 (6.7)                                          |
| <b><math>I/\sigma</math></b>            | 68.9 (10.5)                                           | 15.4 (6.6)                                         |
| <b>Refinement</b>                       |                                                       |                                                    |
| <b>Resolution</b>                       | 25 – 1.70 Å                                           | 25 – 2.11 Å                                        |
| <b>R (<math>R_{\text{free}}</math>)</b> | 0.196 (0.222)                                         | 0.176 (0.211)                                      |
| <b>Ramachandran Statistics</b>          |                                                       |                                                    |
| <b>Most Favored</b>                     | 93.87% (383)                                          | 95.61% (392)                                       |
| <b>Allowed</b>                          | 3.92% (16)                                            | 2.68% (11)                                         |
| <b>Disallowed</b>                       | 2.21% (9)                                             | 1.7% (7)                                           |

[a] The "traditional" sample was grown in microbatch and mounted using a standard crystal mount, [b] the merging of small datasets from "multiple crystals" analyzed *in situ* at room temperature. Reported values are for all hkl's. Values shown in parenthesis represent the value for the highest resolution shell except where indicated. For the Ramachandran statistics the number in parenthesis indicates the number of residues in a given region. R-factor =  $\sum(|F_{\text{obs}}| - k|F_{\text{calc}}|) / \sum |F_{\text{obs}}|$  and  $R_{\text{free}}$  is the R value for a test set of reflections consisting of a random 5% of the diffraction data not used in refinement.  $R_{\text{sym}} = \sum (|I_i - \langle I_i \rangle|) / \sum I_i$  where  $I_i$  = intensity of the  $i^{\text{th}}$  reflection and  $\langle I_i \rangle$  = mean intensity.

The structural refinement parameters  $R/R_{\text{free}}$  are a measure of how well the refined structure agrees with the observed electron density maps.  $R_{\text{free}}$  provides a metric for cross-validating the quality of the structural model by comparing it with a small test set of “free” reflections which were not used in the refinement of the model.<sup>10,11</sup> Generally speaking, for a structure determination made with data to 2.0Å resolution, the final R-factor would be expected to be ~20%. Not only do our data fall within this range, it is interesting to note that both R and  $R_{\text{free}}$  are lower for the data collected on-chip compared to data obtained via traditional cryogenic methods. Additionally, a larger fraction of the residues in the structures obtained from on-chip data collection fall within the favored zones for structural conformations on a Ramachandran plot.

One of the most interesting statistics associated with our data collection strategy is the mosaicity, or intrinsic disorder within a crystal.<sup>10</sup> The mosaicity of data collected on-chip at room temperature is nearly one order of magnitude lower compared to the cryogenic single-crystal results. While discussions of crystal quality are typically done in terms of resolution, to a certain extent the degree of ordering within the crystal directly affects the quality of diffraction. This lower mosaicity was observed despite the increased potential for radiation damage due to data collection at room temperature and can be attributed to the lack of physical handling as well as the absence of cryocooling, both of which is known to increase crystal mosaicity.<sup>12,13</sup>

## References

1. D. C. Duffy, J. C. McDonald, O. J. A. Schueller and G. M. Whitesides, *Analytical Chemistry*, 1998, **70**, 4974-4984.
2. S. Guha, S. L. Perry, A. S. Pawate and P. J. A. Kenis, *Sensors and Actuators B: Chemical*, 2012 **174**, 1-9.
3. B. R. Schudel, C. J. Choi, B. T. Cunningham and P. J. A. Kenis, *Lab on a Chip*, 2009, **9**, 1676-1680.
4. Z. Otwinowski and W. Minor, *Method Enzymol*, 1997, **276**, 307-326.
5. P. D. Adams, P. V. Afonine, G. Bunkoczi, V. B. Chen, I. W. Davis, N. Echols, J. J. Headd, L.-W. Hung, G. J. Kapral, R. W. Grosse-Kunstleve, A. J. McCoy, N. W. Moriarty, R. Oeffner, R. J. Read, D. C. Richardson, J. S. Richardson, T. C. Terwilliger and P. H. Zwart, *Acta Crystallographica Section D*, 2010, **66**, 213-221.
6. G. Langer, S. X. Cohen, V. S. Lamzin and A. Perrakis, *Nat Protoc*, 2008, **3**, 1171-1179.
7. Schrödinger, LLC, 2010.
8. P. Emsley and K. Cowtan, *Acta Crystallographica Section D*, 2004, **60**, 2126-2132.
9. V. Agarwal, S. A. Borisova, W. W. Metcalf, W. A. van der Donk and S. K. Nair, *Chemistry & Biology*, 2011, **18**, 1230-1240.
10. G. Rhodes, *Crystallography Made Crystal Clear - A Guide for Users of Macromolecular Models*, Elsevier, Amsterdam, 2006.
11. J. Drenth, *Principles of Protein X-ray Crystallography*, Springer, New York, 2007.
12. T. Alcorn and D. H. Juers, *Acta Crystallographica Section D*, 2010, **66**, 366-373.
13. D. H. Juers and B. W. Matthews, *Quarterly Reviews of Biophysics*, 2004, **37**, 105-119.
